# Supplementary material for: Inclusion of Diverse Populations in Genomics Research: A Survey of Investigators
Source: Research Square preprint supplement (doi:10.21203/rs.3.rs-5551656/v1), 2025-07-03
Supplement: Supplementary file 1 [file a0bfe5807941af7c5b0004b9.pdf]

|                          | Study Characteristic                                                                                                                                                               |                                                                                                                                                                                                                                                                  |                                        | Recruitment Outcome    |                   |                               | Involvement of Stakeholders* |                                                                                                                                                                                                                                                                  | Accomodations                                         |                                                           |                                                         |                                       | Barriers and Facilitators                                                                                                                                                                                                                                                                                                                              |                                                                                                                                                                                                                             |                                                                                                                                                                                                           | Demographic of Responder**                                                |                                                                                                 |                                                                                                                         |                                                            |                      |
|--------------------------|------------------------------------------------------------------------------------------------------------------------------------------------------------------------------------|------------------------------------------------------------------------------------------------------------------------------------------------------------------------------------------------------------------------------------------------------------------|----------------------------------------|------------------------|-------------------|-------------------------------|------------------------------|------------------------------------------------------------------------------------------------------------------------------------------------------------------------------------------------------------------------------------------------------------------|-------------------------------------------------------|-----------------------------------------------------------|---------------------------------------------------------|---------------------------------------|--------------------------------------------------------------------------------------------------------------------------------------------------------------------------------------------------------------------------------------------------------------------------------------------------------------------------------------------------------|-----------------------------------------------------------------------------------------------------------------------------------------------------------------------------------------------------------------------------|-----------------------------------------------------------------------------------------------------------------------------------------------------------------------------------------------------------|---------------------------------------------------------------------------|-------------------------------------------------------------------------------------------------|-------------------------------------------------------------------------------------------------------------------------|------------------------------------------------------------|----------------------|
| Racial/Ethnic Group      | Purpose of study                                                                                                                                                                   | Recruitment setting                                                                                                                                                                                                                                              | Age range (years)                      | Recruitment completion | Completed on time | Change in recruitment target? | Stakeholder involmnet        | Capacity of involvement                                                                                                                                                                                                                                          | Official language                                     | Translation of materials                                  | Literacy level                                          | Recruitment outside 9-5pm on weekdays | Barriers to recruitment/participation of minority groups encountered in the past                                                                                                                                                                                                                                                                       | Facilitators of minority groups you have encountered                                                                                                                                                                        | What discourages researchers to recruit minority participants broadly                                                                                                                                     | Race/Ethnicity                                                            | Age/Gender                                                                                      | Academic Rank                                                                                                           | Setting of practice                                        | Completion of survey |
| Hispanic/ Latino (n=5)   | Clinical intervention (60% )<br>Collection of specimens (100%)<br>Genetic and genomic testing (100%)<br>Specimens for biobank (80%)                                                | National (80%)/National and International (20%)<br>Majority of recruitment (>65%) in urban areas<br>Academic hospital (80%)<br>Community hospital (60%)<br>Federally qualified health center (60%)<br>Non-clinical community (40%)                               | 0-18 (40%)<br>19-64 (40%)<br>>65 (20%) | 100%                   | 60%               | 40%                           | 80%                          | Study design (60% community-based, 20% public health entities)<br>Recruitment, retention and/or dissemination (40% patients, 60% community-based)<br>Result interpretation (20% Community-based)                                                                 | Spanish (100%)                                        | Spanish (100%)                                            | 5th grade (40%)<br>8th grande (60%)                     | 80%                                   | Distrust (40%)<br>Lack of time/competing demands (80%)<br>Religious/cultural issues (40%)<br>Don't see personal benefit (80%)<br>Transportation (20%)<br>Staffing issues (40%)<br>Recruitment site restrictions (40%)<br>Inadequate stipends/funding for recruitment (20%)<br>Lack of understanding/education/language barriers (40%)                  | Recruitment times outside 9-5pm (80%)<br>Special accomodation of participants (60%)<br>Quality of recruiters (100%)<br>Involvement of community-based agencies (60%)<br>Stipends (20%)<br>Marketing of study (20%)          | Flexibility of recruitment hours (80%)<br>Higher resources to engage/outreach (80%)<br>Difficult to follow-up/withdrawal (60%)                                                                            | White (60%)<br>Hispanic (20%)<br>Multirace* (20%)                         | 18-35 (20%)<br>36-45 (40%)<br>46-55 (20%)<br>56-65 (20%)<br>>65 (0%)<br><br>60% Female          | Professor (80%)<br>Associate (20%)                                                                                      | Academic (100%)                                            | 100%                 |
| Black/AA (n=7)           | Clinical intervention (14.3% )<br>Collection of specimens (85.7%)<br>Genetic and genomic testing (85.7%)<br>Specimens for biobank (85.7%)<br>Focus group/qualitative study (14.3%) | National (85.7%)/National and International (14.3%)<br>Majority of recruitment (>65%) in urban areas<br>Academic hospital (28.6%)<br>Community hospital (28.6%)<br>Federally qualified health center (28.6%)<br>Non-clinical community (43%)<br>Registry (14.3%) | 0-18 (28.6%)<br>19-64 (71.4%)          | 71.4%                  | 71.4%             | 14.3%                         | 85.7%                        | Study design (14.3% patients, 43% community-based, 28.6% public health entities)<br>Recruitment, retention and/or dissemination (43% patients, 86% community-based, 28.6% public health entities)<br>Result interpretation (14.3% patients, 43% Community-based) | Spanish (14.3%)<br>Xhosa, Shangaan, Afrikaans (14.3%) | Spanish (14.3%)                                           | None (42.3%)<br>5th grade (28.6%)<br>8th grande (28.6%) | 100%                                  | Distrust (43%)<br>Lack of time/competing demands (85.7%)<br>Religious/cultural issues (14.3%)<br>Don't see personal benefit (28.6%)<br>Transportation (28.6%)<br>Staffing issues (43%)<br>Recruitment site restrictions (57.1%)<br>Inadequate stipends/funding for recruitment (57.1%)<br>Lack of understanding/education/language barriers (43%)      | Recruitment times outside 9-5pm (100%)<br>Special accomodation of participants (57.1%)<br>Quality of recruiters (71.5%)<br>Involvement of community-based agencies (100%)<br>Stipends (71.5%)<br>Marketing of study (43%)   | Fear of distrust (28.6%)<br>Flexibility of recruitment of hours (28.6%)<br>Higher resources to engage/outreach (28.6%)<br>Difficult to follow-up/withdrawal (28.6%)                                       | White (14.3%)<br>Asian/SA (28.6%)<br>Black/AA (43%)                       | 18-35 (0%)<br>36-45 (28.5%)<br>46-55 (28.5%)<br>56-65 (14.3%)<br>>65 (0%)<br><br>85.7% Female   | Professor (14.3%)<br>Associate (14.3%)<br>Assistant (14.3%)<br>Staff researcher (28.5%)<br>Distinguished fellow (14.3%) | Academic (57%)<br>Government (14.3%)<br>Non-profit (14.3%) | 86%                  |
| Asian/ South Asian (n=3) | Clinical intervention (100% )<br>Collection of specimens (100%)<br>Genetic and genomic testing (100%)                                                                              | International (100%)<br>Majority of recruitment (>90%) rural<br>Community hospital (100%)<br>Non-clinical community (100%)                                                                                                                                       | 0-18 (50%)<br>19-64 (50%)              | 100.0%                 | 100.0%            | 0.0%                          | 100.0%                       | Study design (100% community-based, 100% public health entities)<br>Recruitment, retention and/or dissemination (100% patients, 100% community-based)<br>Result interpretation (100% public health entities)                                                     | Khmer (100%)                                          | Khmer (100%)                                              | None (100%)                                             | 100%                                  | Distrust (33.3%)<br>Lack of time/competing demands (100%)<br>Don't see personal benefit (66.6%)<br>Transportation (66.6%)<br>Staffing issues (33.3%)<br>Recruitment site restrictions (33.3%)<br>Inadequate stipends/funding for recruitment (100%)<br>Lack of understanding/education/language barriers (100%)                                        | Recruitment times outside 9-5pm (100%)<br>Special accomodation of participants (100%)<br>Quality of recruiters (33.3%)<br>Involvement of community-based agencies (66.6%)<br>Stipends (71.5%)<br>Marketing of study (43%)   | Flexibility of recruitment of hours (33.3%)<br>Higher resources to engage/outreach (100%)<br>Difficult to follow-up/withdrawal (66.6%)                                                                    | White (66.6%)<br>Asian/SA (33.3%)                                         | 18-35 (0%)<br>36-45 (0%)<br>46-55 (100%)<br>56-65 (0%)<br>>65 (0%)<br><br>0% Female             | Associate (66.6%)<br>Other (33.3%)                                                                                      | Academic (66.6%)<br>Government (33.3%)                     | 100%                 |
| White (n=35)             | Clinical intervention (43% )<br>Collection of specimens (100%)<br>Genetic and genomic testing (94.2%)<br>Specimens for biobank (43%)<br>Genotypic/phenotypic correlation (2.9%)    | National (88.5%)/National and International (11.5%)<br>Urban recruitment (49%)<br>Academic hospital (65.7.6%)<br>Community hospital (40%)<br>Federally qualified health center (5.7%)<br>Non-clinical community (25.7%)<br>Registry (5.7%)                       | 0-18 (50%)<br>19-64 (50%)              | 94.2%                  | 80.0%             | 31.3%                         | 60.0%                        | Study design (31% patients, 40% community-based, 6% public health entities)<br>Recruitment, retention and/or dissemination (28.5% patients, 40% community-based, )<br>Result interpretation (5.7% patients, 8.6% community-based, )                              | Spanish (32%)<br>Chinese (5.7%)                       | Spanish (32%)<br>Chinese (5.7%)<br>Russian/Italian (2.8%) | None (14.7%)<br>5th grade (23.5%)<br>8th grande (61.7%) | 43%                                   | Distrust (71.4%)<br>Lack of time/competing demands (85.7%)<br>Religious/cultural issues (5.7%)<br>Don't see personal benefit (14.2%)<br>Transportation (25.7%)<br>Staffing issues (54.2%)<br>Recruitment site restrictions (17.1%)<br>Inadequate stipends/funding for recruitment (25.7%)<br>Lack of understanding/education/language barriers (34.2%) | Recruitment times outside 9-5pm (43%)<br>Special accomodation of participants (42.8%)<br>Quality of recruiters (51.4%)<br>Involvement of community-based agencies (17.1%)<br>Stipends (42.8%)<br>Marketing of study (14.2%) | Fear of distrust (11.4%)<br>Flexibility of recruitment of hours (20%)<br>Higher resources to engage/outreach (68.5%)<br>Difficult to follow-up/withdrawal (25.7%)<br>Difficulty Analyzing results (25.7%) | White (77.4%)<br>Hispanic (6.5%)<br>Asian/SA (12.9%)<br>Multirace* (3.2%) | 18-35 (3.4%)<br>36-45 (6.4%)<br>46-55 (27.5%)<br>56-65 (44.8%)<br>>65 (17.2%)<br><br>36% Female | Professor (73.3%)<br>Associate (10%)<br>Assistant (10%)<br>Staff researcher (6.7%)                                      | Academic (89.2%)<br>Government (7.1%)<br>Community (3.5%)  | 80%                  |

Supplemental table: Recruitment by ethnic and racial group. This table presents aggregate data for visualization purposes, including only studies that recruited more than 50% of a specific population. For Hispanic/Latino recruitment, two studies set targets of 100%, one set a target of 90%, another 75%, and one 61%. One study reported recruitment in Puerto Rico/Guam. For Black/African American (AA) recruitment, six studies set targets of 100%, and one set a target of 55%. Recruitment outside the United States was reported in Sub-Saharan Africa (South Africa), and one study reported using Spanish as an official language without translating materials. For Asian recruitment, all studies set targets of 100%, with recruitment conducted in Cambodia. While all three investigators likely participated in the same research project, data are presented independently to reflect the study’s focus on researchers’ perceptions.

\* Stakeholders: only patients, community-based agencies, advocates and public health entities are considered in this group for the purpose of this table.

\*\* Only six out of seven researchers in the Black/AA study group provided information about race/ethnicity
